# Supplementary material
Source: PubMed Central journal article supplement (PMC3393388)
Supplement: supp_56.7.3648_TableS1-S4_FigS1-S2.pdf [file supp_56.7.3648_TableS1-S4_FigS1-S2.pdf]

## Antimicrobial Agents and Chemotherapy

### Supplementary Material

## Function of the cytochrome P450 enzymes MycCI and MycG in *Micromonospora griseorubida*, a producer of the macrolide antibiotic mycinamicin

Yojiro Anzai, Shu-ichi Tsukada, Ayami Sakai, Ryohei Masuda, Chie Harada, Ayaka Domeki, Shengying Li, Kenji Kinoshita, David H. Sherman, and Fumio Kato

Table S1. PCR primers used in this study

| Primer             | Sequence (5'-3')                                             | Restriction site              |
|--------------------|--------------------------------------------------------------|-------------------------------|
| DmycCIF            | CTGTCTGACGATGGGCAGAAGATGGTGGTCTGGCCCATGgggtgccagggcgtgccctt  | -                             |
| DmycCIR            | CCAGGACTATCCGCATACCGCACCCCATTCGTCCGTCAtgtaggctggagctgcttc    | -                             |
| DmycGF             | TAGATATGAGGAGGGCTTTCTGGCAGCCTCGGTTCGGGTGgggtgccagggcgtgccctt | -                             |
| DmycGR1            | ACGTACACATCCTCCACCGGTAGCGCGGGAACGCCGTTCTgtaggctggagctgcttc   | -                             |
| DmycGR2            | GCGGTTCGGGTTCGATCCGGCCCGACCACCGCGCCTGTCAgtaggctggagctgcttc   | -                             |
| RecognitionDmycGF  | CGGAGGAGAGTCCGGGAGGTC                                        | -                             |
| RecognitionDmycGR1 | CGAACCCGAGATGCTGATTG                                         | -                             |
| RecognitionDmycGR2 | ACGAGATCGTCGAGATCGAC                                         | -                             |
| mycCIproF          | GCTGCATGCCAGAAATACCTCCTTGCCTGGTG                             | <i>Sph</i> I                  |
| mycCIIR            | TGACAAGCTTACTCCTGTTGGCCACCTGTCCCCTG                          | <i>Hin</i> dIII               |
| myrBpF             | GTAAAGCTTAACGCTCGGTGATCGGGGTG                                | <i>Hin</i> dIII               |
| myrBpR             | GCAAGCTTGATGACATATGTTTCCCTTGGGTTC                            | <i>Hin</i> dIII, <i>Nde</i> I |
| myrBpF3            | TGAAGCAGCAGGCCCGCCAGTTCCTTC                                  | -                             |
| myrBpartialF       | ACATGCTCCGGTACGACTTC                                         | -                             |
| mycBpR1            | CGACCGAGGCTGCCAGAAAG                                         | -                             |
| myrBmycGR1         | GGCTCGGTCTCCTGCAACTC                                         | -                             |
| RecognitionDmycCIF | ACTTCCCCTCAGAATTCCTG                                         | -                             |
| RecognitionDmycCIR | CAGCAGTTCCGGTGTCACTG                                         | -                             |
| mycGpartialF       | GTGCTCGGTGACGGACGCTTC                                        | -                             |
| mycGpartialR       | CCAGTGCCACCTGGAGTTCAC                                        | -                             |
| mycCIpartialF      | TCAGCAGATACGAGCACGTC                                         | -                             |
| mycCIpartialR      | CGAGGACAGCAGAATTATCAG                                        | -                             |
| 152attPF           | AATCGCTCTTCGTTTCGTTCTG                                       | -                             |
| 152intR            | AATGCCCGACGAACCTGAAC                                         | -                             |
| MGneo860F          | TCTCCTGTATCTCACCTTG                                          | -                             |
| MGneo630R          | TCATAGCCGAATAGCCTCTC                                         | -                             |

The unique priming sites of disruption cassettes are shown in lower case. The relevant restriction sites for genetic manipulation are underlined.

Table S2. <sup>13</sup>C- and <sup>1</sup>H-NMR data of F-1 (14-hydroxy-M-III, M-IX), and comparison with <sup>13</sup>C-NMR data of mycinamicins.

| Position             | M-I <sup>a</sup>      | M-III <sup>b</sup>    | M-V <sup>a</sup>      | M-IX <sup>a</sup>     | F-1 (14-hydroxy-M-III, M-IX) |                       |                      |              |               |
|----------------------|-----------------------|-----------------------|-----------------------|-----------------------|------------------------------|-----------------------|----------------------|--------------|---------------|
|                      | <sup>13</sup> C (ppm) | <sup>13</sup> C (ppm) | <sup>13</sup> C (ppm) | <sup>13</sup> C (ppm) |                              | <sup>13</sup> C (ppm) | <sup>1</sup> H (ppm) | Multiplicity | Coupling (Hz) |
| 1                    | 166.7                 | 166.1                 | 166.3                 | 166.4                 | C                            | 166.4                 | -                    | -            | -             |
| 2                    | 120.1                 | 120.9                 | 120.7                 | 121.1                 | CH                           | 120.8                 | 5.83                 | d            | 15.4          |
| 3                    | 151.5                 | 151.7                 | 151.8                 | 151.9                 | CH                           | 152.0                 | 6.60                 | dd           | 9.8,15.5      |
| 4                    | 41.9                  | 41.3                  | 41.3                  | 41.3                  | CH                           | 41.3                  | 2.71                 | m            | -             |
| 5                    | 87.5                  | 87.8                  | 87.7                  | 87.9                  | CH                           | 87.9                  | 3.26 <sup>c</sup>    | -            | -             |
| 6                    | 34.2                  | 34.1                  | 34.1                  | 34.4                  | CH                           | 34.1                  | 1.22 <sup>c</sup>    | -            | -             |
| 7                    | 32.1                  | 32.6                  | 32.7                  | 33.2                  | CH <sub>2</sub>              | 32.7                  | 1.52                 | dd           | 3.4,14.0      |
|                      |                       |                       |                       |                       |                              |                       | 1.57 <sup>c</sup>    | -            | -             |
| 8                    | 44.7                  | 44.9                  | 44.8                  | 44.8                  | CH                           | 44.9                  | 2.54 <sup>c</sup>    | -            | -             |
| 9                    | 200.8                 | 203.7                 | 203.8                 | 203.4                 | C                            | 203.9                 | -                    | -            | -             |
| 10                   | 125.6                 | 123.2                 | 123.8                 | 124.6                 | CH                           | 124.0                 | 6.27                 | d            | 14.9          |
| 11                   | 143.7                 | 141.8                 | 141.4                 | 141.3                 | CH                           | 141.4                 | 7.14                 | dd           | 11.2,15.1     |
| 12                   | 59.6                  | 133.0                 | 130.5                 | 130.6                 | CH                           | 130.8                 | 6.47                 | dd           | 11.1,15.0     |
| 13                   | 59.0                  | 141.3                 | 143.5                 | 143.3                 | CH                           | 143.4                 | 6.02                 | d            | 15.1          |
| 14                   | 47.5                  | 49.2                  | 77.4                  | 77.6                  | CH                           | 77.6                  | -                    | -            | -             |
| 15                   | 72.4                  | 73.7                  | 75.8                  | 76.1                  | CH                           | 75.7                  | 4.81                 | dd           | 2.2,11.0      |
| 16                   | 24.7                  | 25.2                  | 21.4                  | 21.6                  | CH <sub>2</sub>              | 21.5                  | 1.56 <sup>c</sup>    | -            | -             |
|                      |                       |                       |                       |                       |                              |                       | 1.84                 | m            | -             |
| 17                   | 8.9                   | 9.7                   | 10.4                  | 10.4                  | CH <sub>3</sub>              | 10.4                  | 0.91                 | t            | 7.5           |
| 18                   | 18.9                  | 19.4                  | 19.5                  | 19.5                  | CH <sub>3</sub>              | 19.6                  | 1.23                 | d            | 6.6           |
| 19                   | 17.1                  | 17.4                  | 17.4                  | 17.4                  | CH <sub>3</sub>              | 17.4                  | 0.99                 | d            | 6.6           |
| 20                   | 17.5                  | 17.7                  | 17.6                  | 17.6                  | CH <sub>3</sub>              | 17.6                  | 1.14                 | d            | 6.9           |
| 21                   | 67.1                  | 68.7                  | 75.2                  | 74.7                  | CH <sub>2</sub>              | 75.6                  | 3.77                 | d            | 11.0          |
|                      |                       |                       |                       |                       |                              |                       | 3.88                 | d            | 10.0          |
| 1'                   | 105.5                 | 104.9                 | 104.8                 | 105.2                 | CH                           | 104.9                 | 4.24                 | d            | 7.3           |
| 2'                   | 70.3                  | 70.4                  | 70.4                  | 70.3                  | CH                           | 69.3                  | 3.49 <sup>c</sup>    | -            | -             |
| 3'                   | 65.8                  | 65.8                  | 65.8                  | 66.2                  | CH                           | 66.0                  | 2.55 <sup>c</sup>    | -            | -             |
| 4'                   | 28.5                  | 28.4                  | 28.4                  | 28.9                  | CH <sub>2</sub>              | 28.7                  | 1.26 <sup>c</sup>    | -            | -             |
|                      |                       |                       |                       |                       |                              |                       | 1.69                 | dd           | 1.7,12.7      |
| 5'                   | 69.4                  | 69.5                  | 69.4                  | 69.5                  | CH                           | 69.1                  | 4.21                 | t            | 3.1           |
| 6'                   | 21.2                  | 21.2                  | 21.2                  | 21.2                  | CH <sub>3</sub>              | 21.1                  | 1.24                 | d            | 6.0           |
| NMe <sub>2</sub>     | 40.1                  | 40.2                  | 40.2                  | 40.4                  | CH <sub>3</sub>              | 40.3                  | 2.34                 | s            | -             |
| 1''                  | 100.9                 | 100.8                 | 101.6                 | 101.4                 | CH                           | 101.5                 | 4.57                 | d            | 7.8           |
| 2''                  | 81.9                  | 80.1                  | 81.7                  | 80.3                  | CH                           | 79.9                  | 3.02                 | dd           | 3.0,7.8       |
| 3''                  | 79.3                  | 69.8                  | 79.2                  | 70.9                  | CH                           | 70.4                  | 3.28 <sup>c</sup>    | -            | -             |
| 4''                  | 72.7                  | 72.8                  | 72.5                  | 72.9                  | CH                           | 72.5                  | 3.21                 | dd           | 3.1,9.5       |
| 5''                  | 70.6                  | 69.8                  | 70.7                  | 70.9                  | CH                           | 70.2                  | 3.69                 | m            | -             |
| 6''                  | 17.8                  | 17.7                  | 17.6                  | 17.6                  | CH <sub>3</sub>              | 17.5                  | 1.30                 | d            | 6.2           |
| 2''-OCH <sub>3</sub> | 59.0                  | 59.4                  | 59.1                  | 58.9                  | CH <sub>3</sub>              | 58.9                  | 3.50                 | s            | -             |
| 3''-OCH <sub>3</sub> | 61.6                  | -                     | 61.7                  | -                     | -                            | -                     | -                    | -            | -             |

<sup>a</sup> Kinoshita, K., S. Takenaka, H. Suzuki, T. Morohoshi, and M. Hayashi. 1992. Mycinamicins, new macrolide antibiotics. XIII. Isolation and structures of novel fermentation products from *Micromonospora griseorubida* (FERM BP-705). *J. Antibiot.* 45:1-9.

<sup>b</sup> Hayashi, M., M. Ohno, K. Kinoshita, S. Sato, M. Suzuki, and K. Harada. 1981. Mycinamicins, new macrolide antibiotics. III Isolation and structures of mycinamicin aglycones, mycinolide IV and V. *J. Antibiot.* 34:346-349.

<sup>c</sup> Overlapping

Table S3. <sup>13</sup>C- and <sup>1</sup>H-NMR data of F-2 (12,13-epoxy-M-III), and comparison with <sup>13</sup>C-NMR data of mycinamicins.

|                      | M-I <sup>a</sup>      | M-III <sup>a</sup>    |                 | F-2 (12,13-epoxy-M-III) |                      |              |               |
|----------------------|-----------------------|-----------------------|-----------------|-------------------------|----------------------|--------------|---------------|
|                      | <sup>13</sup> C (ppm) | <sup>13</sup> C (ppm) |                 | <sup>13</sup> C (ppm)   | <sup>1</sup> H (ppm) | Multiplicity | Coupling (Hz) |
| 1                    | 166.7                 | 166.1                 | C               | 165.7                   | -                    | -            | -             |
| 2                    | 120.1                 | 120.9                 | CH              | 120.5                   | 5.83                 | d            |               |
| 3                    | 151.5                 | 151.7                 | CH              | 151.0                   | 6.59                 | dd           |               |
| 4                    | 41.9                  | 41.3                  | CH              | 41.7                    | 2.72                 | m            |               |
| 5                    | 87.5                  | 87.8                  | CH              | 87.6                    | 3.32 <sup>b</sup>    | -            | -             |
| 6                    | 34.2                  | 34.1                  | CH              | 34.2                    | 1.18 <sup>b</sup>    | -            |               |
| 7                    | 21.1                  | 32.6                  | CH <sub>2</sub> | 32.0                    | 1.47 <sup>b</sup>    | -            | -             |
|                      |                       |                       |                 |                         | 1.62 <sup>b</sup>    | -            | -             |
| 8                    | 44.7                  | 44.9                  | CH              | 44.6                    | 2.56                 | m            |               |
| 9                    | 200.8                 | 203.7                 | C               | 200.7                   | -                    | -            | -             |
| 10                   | 125.6                 | 123.2                 | CH              | 125.6                   | 6.56                 | d            |               |
| 11                   | 143.7                 | 141.8                 | CH              | 144.0                   | 6.40                 | dd           |               |
| 12                   | 59.6                  | 133.0                 | CH              | 59.0                    | 3.25 <sup>b</sup>    | -            | -             |
| 13                   | 59.0                  | 141.3                 | CH              | 59.0                    | 3.09                 | dd           |               |
| 14                   | 47.5                  | 49.2                  | CH              | 47.4                    | 1.40                 | m            |               |
| 15                   | 72.4                  | 73.7                  | CH              | 72.5                    | 5.32                 | m            |               |
| 16                   | 24.7                  | 25.2                  | CH <sub>2</sub> | 24.8                    | 1.54                 | m            |               |
|                      |                       |                       |                 |                         | 1.86                 | qd           |               |
| 17                   | 8.9                   | 9.7                   | CH <sub>3</sub> | 8.9                     | 0.88                 | dd           |               |
| 18                   | 18.9                  | 19.4                  | CH <sub>3</sub> | 19.0                    | 1.21                 | d            |               |
| 19                   | 17.1                  | 17.4                  | CH <sub>3</sub> | 17.0                    | 0.96                 | d            |               |
| 20                   | 17.5                  | 17.7                  | CH <sub>3</sub> | 17.5                    | 1.15                 | d            |               |
| 21                   | 67.1                  | 68.7                  | CH <sub>2</sub> | 67.4                    | 3.60 <sup>b</sup>    | -            |               |
|                      |                       |                       |                 |                         | 4.18                 | dd           |               |
| 1'                   | 105.5                 | 104.9                 | CH              | 103.6                   | 4.35                 | d            |               |
| 2'                   | 70.3                  | 70.4                  | CH              | 69.6                    | 3.52                 | m            |               |
| 3'                   | 65.8                  | 65.8                  | CH              | 66.7                    | 3.30                 | m            |               |
| 4'                   | 28.5                  | 28.4                  | CH <sub>2</sub> | 31.2                    | 1.47                 | m            |               |
|                      |                       |                       |                 |                         | 1.99                 | m            |               |
| 5'                   | 69.4                  | 69.5                  | CH              | 67.9                    | 3.57 <sup>b</sup>    | -            | -             |
| 6'                   | 21.2                  | 21.2                  | CH <sub>3</sub> | 20.8                    | 1.30                 | d            |               |
| 7'                   | 40.1                  | 40.2                  | CH <sub>3</sub> | 39.0                    | 2.85                 | br s         |               |
| 8'                   | 40.1                  | 40.2                  | CH <sub>3</sub> | 41.5                    | 2.85                 | br s         |               |
| 1''                  | 100.9                 | 100.8                 | CH              | 100.7                   | 4.55                 | d            |               |
| 2''                  | 81.9                  | 80.1                  | CH              | 80.1                    | 3.06                 | dd           |               |
| 3''                  | 79.3                  | 69.8                  | CH              | 69.5                    | 4.20                 | dd           |               |
| 4''                  | 72.7                  | 72.8                  | CH              | 72.9                    | 3.24 <sup>b</sup>    | -            | -             |
| 5''                  | 70.6                  | 69.8                  | CH              | 70.0                    | 3.65                 | dd           |               |
| 6''                  | 17.8                  | 17.7                  | CH <sub>3</sub> | 17.6                    | 1.30                 | d            | -             |
| 2''-OCH <sub>3</sub> | 59.0                  | 59.4                  | CH <sub>3</sub> | 59.3                    | 3.57                 | s            |               |
| 3''-OCH <sub>3</sub> | 61.6                  | -                     | -               | -                       | -                    | -            | -             |

<sup>a</sup> Kinoshita, K., S. Takenaka, H. Suzuki, T. Morohoshi, and M. Hayashi. 1992. Mycinamicins, new macrolide antibiotics. XIII. Isolation and structures of novel fermentation products from *Micromonospora griseorubida* (FERM BP-705). *J. Antibiot.* 45:1-9.

<sup>b</sup> Overlapping

Table S4. Antibacterial activities of mycinamicins

| Microorganism               | MIC (µg/ml)                     |                             |       |      |
|-----------------------------|---------------------------------|-----------------------------|-------|------|
|                             | 14-hydroxy-M-III<br>(M-IX, F-1) | 12,13-epoxyl-M-III<br>(F-2) | M-III | M-IV |
| <i>S. aureus</i> ATCC 25923 | 0.78                            | 0.20                        | 0.10  | 0.10 |
| <i>M. luteus</i> ATCC 9341  | 0.10                            | 0.05                        | 0.02  | 0.02 |
| <i>E. coli</i> ATCC 25922   | 100                             | 100                         | >100  | 100  |

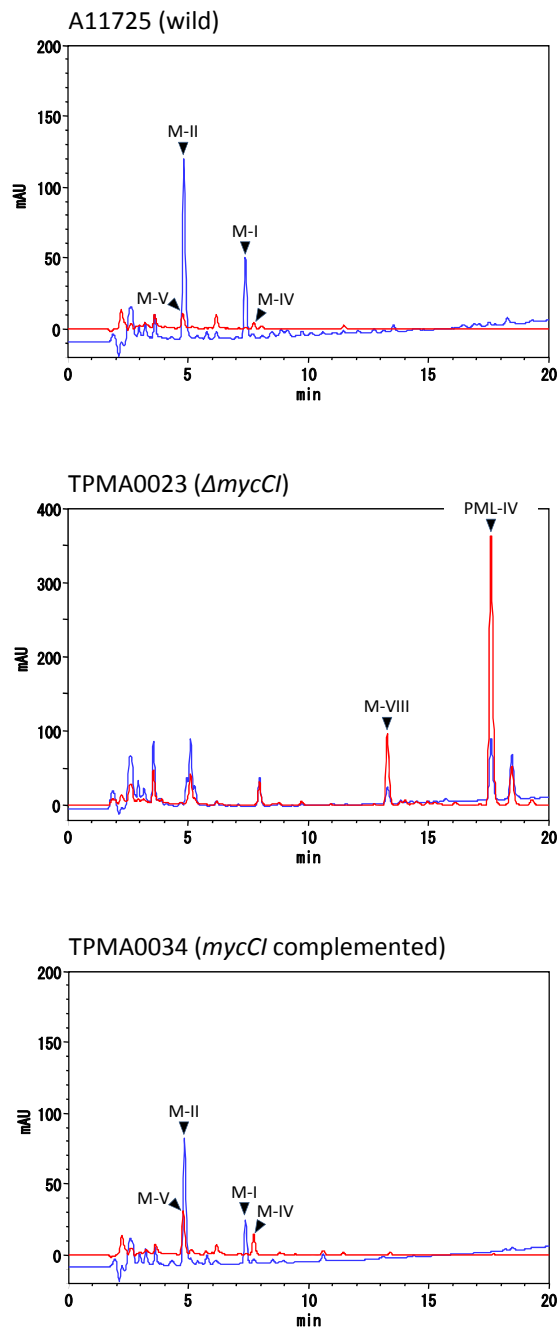

Figure S1. HPLC chromatograms of the EtOAc extract obtained from the culture broth of *M. griseorubida* A11725 (wild), TPMA0023 ( $\Delta mycI$ ), and TPMA0034 (*mycI* complemented). The EtOAc extract from the culture broth of TPMA0023 was not treated with 0.1% TFA. HPLC conditions: column, ODS-80T<sub>M</sub> (Tosoh); mobile phase, a 20-min. linear gradient from 35% MeCN to 70% MeCN containing 0.1% TFA; flow rate, 0.8 mL/min; UV wavelength, 200–300 nm. Blue line, at 240 nm; red line, at 280 nm.

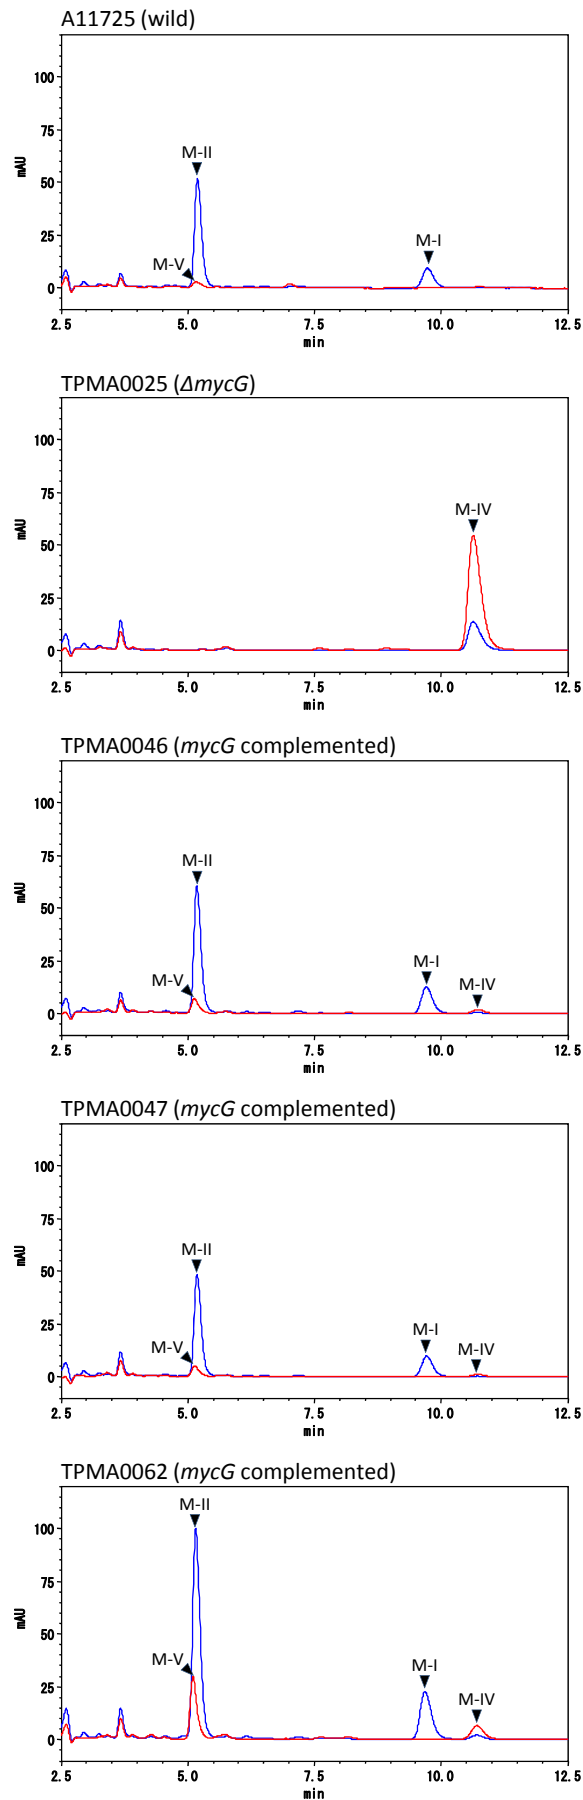

Figure S2. HPLC chromatograms of the EtOAc extract obtained from the culture broth of wild strain *M. griseorubida* A11725, *mycG* disruption mutant TPMA0025, and *mycG* complementation strains TPMA0034, TPMA0047, and TPMA0062. HPLC conditions: column, ODS-80T<sub>M</sub> (Tosoh); mobile phase, MeCN, 0.06% TFA (35:65); flow rate, 0.8 mL/min; UV wavelength, 200–300 nm. Blue line, at 240 nm; Red line, at 280 nm.
